# Supplementary material for: Comparative analysis of automatic segmentation of esophageal cancer using 3D Res-UNet on conventional and 40-keV virtual mono-energetic CT Images: a retrospective study
Source: PeerJ. 2023 Jul 17;11:e15707. doi: 10.7717/peerj.15707 (PMC10358343; doi:10.7717/peerj.15707)
Supplement: Supplemental Information 1 [file peerj-11-15707-s001.xlsx]

## Sheet: Sheet1
patient	DSC-40kev	ASSD-40kev	DSC-CI	ASSD-CI		IOU-40kev	HD_95-40kev	IOU-conv	HD_95-conv
1	0.910395	0.621309	0.92228	0.508564		0.835527	2.23607	0.85577	2.23607
2	0.831196	1.12742	0.78046	2.49365		0.711151	6.7082	0.639962	24.3516
3	0.912595	0.519567	0.905804	0.612706		0.839241	2.23607	0.827826	4
4	0.898806	0.745915	0.892605	0.777318		0.816211	5.65685	0.80604	5.38516
5	0.921277	0.654078	0.919274	0.687432		0.854044	3.16228	0.850609	5
6	0.852141	0.61152	0.796075	0.891931		0.742374	3	0.661233	5.09902
7	0.896731	0.640329	0.842571	1.14284		0.812795	3	0.727968	9
8	0.819294	1.01503	0.859498	0.79362		0.693902	3.74166	0.753613	3
9	0.923221	0.377741	0.908348	0.461776		0.857392	2	0.832085	2
10	0.840172	1.2502	0.860431	1.03649		0.724394	7	0.75505	5.83095
11	0.935207	0.319888	0.936392	0.318613		0.8783	1	0.880392	1.41421
12	0.826165	2.22639	0.843537	1.70336		0.703818	18	0.729411	12
13	0.7816	1.43432	0.754802	1.60617		0.641498	10.0499	0.60617	10.8167
14	0.792363	1.12546	0.772552	1.24687		0.656127	4.58258	0.629397	5
15	0.890624	0.589238	0.88845	0.606972		0.802815	2.23607	0.799289	2.23607
16	0.840887	1.10644	0.606098	6.86962		0.725458	5.09902	0.434821	45.5851
17	0.850425	1.62997	0.848392	1.64127		0.739774	9	0.736702	9
18	0.864382	1.0278	0.836744	3.28684		0.761155	5.74456	0.719311	30.0167
19	0.908129	0.586536	0.914278	0.546258		0.831719	3	0.842093	2.23607
20	0.890364	2.4054	0.889617	2.80165		0.802393	31	0.801181	38
21	0.791337	1.5695	0.775135	1.60965		0.654721	11	0.632832	10
22	0.847504	1.23407	0.89663	0.799155		0.735363	10	0.812628	7
23	0.888866	1.07601	0.886652	0.925262		0.799963	8.60233	0.796384	6.63325
24	0.835628	2.14983	0.688047	4.8811		0.717664	18.5742	0.524445	34
25	0.772706	1.96861	0.747574	3.54488		0.629601	15.1327	0.5969	29
26	0.886115	0.651109	0.790449	1.7728		0.795518	3.74166	0.653507	14.5602
27	0.87988	0.44736	0.801131	1.75918		0.785523	2	0.668239	16.0624
28	0.893175	0.626335	0.895756	0.632051		0.806971	4.24264	0.811194	5
29	0.86851	0.662474	0.875299	0.593524		0.76758	4.12311	0.778251	3
30	0.915083	0.806345	0.911923	0.852709		0.84346	4	0.838106	3.60555
