# Supplementary material for: Comparative analysis of automatic segmentation of esophageal cancer using 3D Res-UNet on conventional and 40-keV virtual mono-energetic CT Images: a retrospective study
Source: PeerJ. 2023 Jul 17;11:e15707. doi: 10.7717/peerj.15707 (PMC10358343; doi:10.7717/peerj.15707)
Supplement: Supplemental Information 2 [file peerj-11-15707-s002.xlsx]

## Sheet: train
PTN_NAME	Sex	age	location：(cervical:1) (upper:2) (middle :3) (lower:4) (upper +middle:5) (middle + lower:6)	Grade of differentiation: (high:1) (medium-high:2) (medium:3) (low-medium:4) (low:5)	Histopathology (Squamous cell :1) (Non-Squamous cell :2)	T-stage	tumor size
				Well/moderate = 1 + 2 +3
				prooly = 4 +5
patient1	M	79.9753	3	4	1	3	36.682
patient2	M	69.0274	6	3	1	3	119.335
patient3	M	65.5123	4	3	1	3	11.317
patient4	M	64.1534	6	3	1	3	20.169
patient5	M	75.2548	4	3	1	3	73.391
patient6	M	65.6712	4	2	1	3	42.642
patient7	M	57.7699	6	3	1	3	29.72
patient8	M	79.1973	6	2	1	2	24.984
patient9	M	64.0055	3	3	1	3	10.92
patient10	M	52.5178	5	5	1	2	11.211
patient11	M	68.8493	3	3	1	3	29.43
patient12	M	61.5808	3	3	1	3	29.777
patient13	M	61.9068	4	1	1	3	7.067
patient14	M	64.0849	3	3	1	3	36.789
patient15	M	64.8192	3	4	1	3	6.832
patient16	M	73.6411	3	3	1	3	31.484
patient17	F	62.8301	3	3	1	3	24.569
patient18	M	73.8521	6	3	1	3	8.594
patient19	F	61.4493	6	3	1	2	15.14
patient20	M	59.989	2	3	1	3	22.869
patient21	M	56.326	5	3	1	3	12.503
patient22	M	62.7699	3	3	1	4	64.613
patient23	M	56.2493	5	3	1	3	17.898
patient24	M	58.8795	6	3	1	3	20.177
patient25	F	68.5452	3	3	1	3	31.61
patient26	M	71.5534	6	3	1	3	40.138
patient27	M	62.2986	3	4	1	4	54.407
patient28	F	70.9096	3	3	1	3	29.014
patient29	M	66.5123	3	3	1	3	10.412
patient30	F	72.8658	5	4	1	3	9.944
patient31	M	53.5507	6	3	2	3	19.322
patient32	M	72.0712	3	3	1	3	13.716
patient33	M	63.5671	5	3	1	3	41.644
patient34	M	64.0082	3	3	1	3	27.534
patient35	F	72.7781	2	3	1	2	12.609
patient36	M	59.2466	3	3	1	4	14.478
patient37	M	48.8795	3	3	1	3	29.54
patient38	F	67.8082	4	3	1	3	23.622
patient39	M	72.9507	3	3	1	4	32.903
patient40	M	52.2301	6	3	1	3	41.089
patient41	M	52.9151	6	3	1	2	4.164
patient42	M	65.1452	5	3	1	3	10.719
patient43	M	55.8575	6	3	1	3	27.247
patient44	F	65.4603	6	3	1	2	30.493
patient45	M	68.9836	2	3	1	3	11.773
patient46	M	54.8767	3	3	1	2	6.587
patient47	F	74.463	3	3	1	3	9.048
patient48	M	87.5616	5	5	1	3	25.327
patient49	M	66.2493	3	3	1	3	11.22
patient50	M	69.8411	4	3	1	3	33.132
patient51	M	70.7151	6	3	1	3	12.141
patient52	M	78.7562	6	3	1	3	50.949
patient53	F	74.011	3	3	1	3	33.318
patient54	M	52.8712	6	3	1	3	67.996
patient55	M	63.389	4	3	1	4	23.964
patient56	M	38.6438	3	3	1	3	20.482
patient57	M	62.1123	3	3	1	3	30.265
patient58	M	54.8849	5	3	1	3	30.365
patient59	M	53.1973	3	3	1	3	8.76
patient60	M	65.7425	3	3	1	3	24.212
patient61	M	65.5616	6	3	1	3	19.511
patient62	M	59.7918	3	2	1	3	34.073
patient63	M	54.9288	5	3	1	4	23.026
patient64	F	60.1863	5	3	1	3	15.821
patient65	M	70.7671	6	3	1	4	30.324
patient66	F	63.211	3	5	1	3	13.214
patient67	M	65.8329	3	3	1	3	34.354
patient68	M	63.4877	6	3	2	3	31.539
patient69	F	70.274	4	4	1	4	15.004
patient70	F	75.0438	6	3	1	4	35.545
patient71	F	72.8575	3	3	1	3	17.028
patient72	M	51.8493	6	2	1	3	31.809
patient73	F	55.8712	4	3	1	3	8.817
patient74	F	67.9918	3	3	1	3	12.351
patient75	M	72.5726	2	3	1	2	7.06
patient76	M	75.7205	2	3	1	2	9.083
patient77	M	57.4082	4	3	1	3	26.277
patient78	M	63.3973	4	3	1	3	15.024
patient79	M	55.4877	6	5	1	3	56.368
patient80	M	55.6493	4	3	1	4	24.961
patient81	F	53.7014	5	3	1	3	20.192
patient82	M	57.2521	6	3	1	3	42.26
patient83	F	77.4685	3	3	1	4	14.487
patient84	M	78.7041	3	3	1	3	75.397
patient85	M	53.2795	3	3	1	3	9.18
patient86	M	45.2192	6	3	1	4	142.815
patient87	M	49.7973	5	3	1	3	104.846
patient88	M	69.6082	3	3	1	3	26.114
patient89	M	50.4877	1	4	1	3	22.778
patient90	M	55.7041	6	3	1	3	11.03
patient91	M	63.3233	4	3	1	2	15.506
patient92	M	57.3205	3	3	1	4	78.741
patient93	F	84.3288	5	5	1	3	38.626
patient94	M	73.4055	3	3	1	3	7.896
patient95	F	53.5068	6	3	1	3	23.454
patient96	F	68.5452	6	3	1	4	35.167
patient97	M	59.2493	6	2	1	4	32.584
patient98	M	72.3342	4	3	1	3	10.307
patient99	M	47.7288	3	3	1	4	27.992
patient100	M	55.2466	6	3	1	4	92.371
patient101	F	70.0521	5	3	1	3	9.916
patient102	F	57.6521	6	3	1	4	52.796
patient103	M	50.8274	6	3	1	3	49.336
patient104	M	48.1616	1	2	1	4	43.237
patient105	F	62.737	4	5	1	3	28.36
patient106	M	49.9726	5	3	2	3	11.312
patient107	M	70.5808	3	3	1	3	19.034
patient108	M	50.9425	3	2	1	3	9.338
patient109	F	65.0959	3	3	1	3	30.156
patient110	F	69.4849	5	3	1	3	12.472
patient111	M	60.9123	5	3	1	3	36.93
patient112	M	59.4795	3	3	1	3	68.456
patient113	M	66.0411	5	3	1	3	42.131
patient114	F	51.2932	5	3	1	3	24.974
patient115	F	73.7425	2	3	1	4	36.024
patient116	M	45.3233	3	3	1	3	71.519
patient117	M	62.3753	2	4	1	3	18.74
patient118	F	66.874	3	3	1	3	5.798
patient119	F	67.3315	6	3	2	4	9.364
patient120	M	74.8521	5	3	1	4	26.13
patient121	M	57.1452	6	4	1	3	28.995
patient122	M	62.8521	3	2	1	3	16.39
patient123	M	62.0137	3	1	1	4	16.986
patient124	M	56.8877	5	3	1	3	34.825
patient125	M	80.263	3	3	1	3	46.801
patient126	M	82.3753	6	3	1	3	36.598
patient127	F	77.011	5	3	1	3	8.5
patient128	M	66.8466	6	3	1	3	78.364
patient129	M	61.1342	6	3	1	3	24.902
patient130	M	67.0548	3	4	1	3	31.447

## Sheet: test
PTN_NAME	sex	age	location：(cervical:1) (upper:2) (middle :3) (lower:4) (upper +middle:5) (middle + lower:6)	Grade of differentiation: (high:1) (medium-high:2) (medium:3) (low-medium:4) (low:5)	Histopathology Squamous cell:1 Non-Squamous cell: 2	T-stage	Tumor size（mm3）
				Well/moderate = 1 + 2 +3
				prooly = 4 +5
patient1	F	73.1562	3	3	1	2	11.598
patient2	M	63.3753	5	3	1	3	12.6
patient3	M	62.5041	5	3	1	3	13.171
patient4	F	74.6849	3	4	1	4	13.075
patient5	M	55.3726	3	3	1	3	79.259
patient6	M	49.337	2	3	1	3	12.179
patient7	F	55.3479	2	3	1	3	33.919
patient8	M	47.263	5	3	1	3	62.965
patient9	M	62.1205	3	3	1	3	14.984
patient10	M	68.6877	5	3	1	3	12.433
patient11	M	53.5918	5	3	1	3	74.393
patient12	M	57.9726	6	3	1	3	44.618
patient13	M	57.5753	6	2	1	3	31.087
patient14	M	56.9616	5	3	2	3	40.049
patient15	M	54.6247	3	3	1	2	17.994
patient16	M	83.4795	6	3	1	3	14.803
patient17	F	57.0822	4	3	1	3	20.043
patient18	M	65.1014	5	3	1	4	47.069
patient19	M	59.8438	4	3	1	4	35.916
patient20	M	71.5452	3	3	1	3	9.091
patient21	M	72.7534	3	3	2	3	16.28
patient22	M	76.6904	3	3	1	3	17.663
patient23	M	65.9014	4	3	1	2	38.537
patient24	M	65.1123	6	3	1	3	15.607
patient25	M	61.9288	3	3	1	3	41.792
patient26	M	56.9205	5	3	1	3	22.645
patient27	M	81.5616	6	3	1	3	36.568
patient28	M	73.8521	4	2	1	3	37.918
patient29	M	78.8384	6	5	1	3	14.588
patient30	M	46.9945	6	3	1	3	118.092
